# Supplementary material for: Circulating osteogenic proteins are associated with coronary artery calcification and increase after myocardial infarction
Source: PLoS One. 2018 Aug 23;13(8):e0202738. doi: 10.1371/journal.pone.0202738 (PMC6107213; doi:10.1371/journal.pone.0202738)
Supplement: S2 Dataset — (XLS) [file pone.0202738.s002.xls]

## Sheet: dados IAM revista (40 pacientes
@#	Date	Sex	Date of birth	Age	Prontuário	Passagem	Height	Weight	BMI	Smoking	MI date	First lab test	MI type	VAR00001	Peak troponine	Killip Adm	LVEF	Main LCA	LDA	RC	CX	Hipertension	Diabtes	previous MI	ASA	ADPin	ACEi/ARB	Metformina	other hipog	previous Statin	Hosp statin	Statin	VAR00003	Dose statin	Duration of statin	Ezetimibe	Fibrate	Ca+ medicat	VitD	Alendronate	Platelet volume	Leuco	CálcioIônico	Creatinine	Glicose	ApoA	ApoB	CT	HDL
1	2014-04-02	1	1960-09-12	53	967161	12964774	1.8	93	28.7	0	2014-03-31	2014-04-02	0		376	1	0.66	0	4	0	3	1	0	0	1	1	1	0	0	0	1	1	1	40	3	0	0	0	0	0	9	10710	4.76	1.09	84	103	78.9	145	33
2	2014-04-01	1	1960-11-26	53	1067489	12955286	1.8	90	27.78	0	2014-03-30	2014-04-02	0		169	1	0.65	0	4	0	0	0	0	0	1	1	1	0	0	3	1	1	1	40		0	0	0	0	0	10	6480	5.08	1.3	85	112	71.3	138	36
3	2014-04-07	1	1944-02-23	70	481341	13014907	1.79	82	25.59	0	2014-04-05	2014-04-08	0		12200	1	0.46	0	4	3	3	1	1	1	1	1	1	1	0	0	1	1	1	40	3	0	0	0	0	0	10.4	8020	4.84	0.84	84	140.6	75	147	57
4	2014-04-10	0	1939-08-10	74	1699014	13033388	1.69	63	22.06	1	2014-04-03	2014-04-10	1		3870	1	0.45	0	4	4	0	0	0	0	1	1	1	0	0	3	1	1	1	20		0	0	0	0	0	11.5	6360	5.12	0.6	157	116.7	63.5	116	34
5	2014-05-02	1	1949-02-15	65	339560	13215425	1.74	81	26.75	0	2014-04-29	2014-05-03	0		5200	1	0.65	0	4	4	0	1	1	0	1	1	1	1	1	0	1	1	1	40	4	0	0	0	0	0	9.8	8610	4.76	0.95	174	101.6	48.8	94	33
6	2014-05-13	0	1953-11-11	60	1697402	13315682	1.63	70	26.35	1	2014-05-11	2014-05-14	0		1800	1	0.6	0	4	1	0	1	0	0	1	1	0	0	0		1	1	1	40		0	0	0	0	0	10.5	8940	4.72	0.76	84	126.3	97	204	46
7	2014-05-13	1	1973-12-16	40	868280	13312118	1.71	80	27.36	0	2014-05-11	2014-05-14	1		24500	1	0.35	0	4	1	2	1	0	0	1	1	1	0	0	0	3	3	1	40	3	0	0	0	0	0	11.6	10650	4.68	0.81	100	95.4	148.1	246	26
9	2014-06-25	1	1963-06-03	51	1401662	13690759	1.66	72	26.13	0	2014-06-24	2014-06-26	0		2950	1		0	0	1	4	0	0	0	1	1	0	0	0	0	2	2	1	40	2	0	0	0	0	0	10	6160	4.88	0.88	98	137.1	107.7	221	43
10	2014-07-08	1	1940-06-29	74	737220	13805976	1.78	73	23.04	0	2014-07-06	2014-07-09	1		8790	1	0.4	0	4	3	3	1	1	0	1	1	0	0	0	0	2	2	1	10	1	0	0	0	0	0	11	5590	4.32	1.2	92	105.3	62.7	143	44
11	2014-07-15	1	1955-04-09	59	1320408	13837147	1.8	98	30.25	0	2014-07-10	2014-07-15	1		730	1	0.66	0	1	4	0	1	0	0	1	1	1	0	0	0	2	2	1	40	4	0	0	0	0	0	12.1	7510	4.88	1	103	125.7	69.7	148	40
12	2014-07-30	1	1944-05-30	70	1543343	13961398	1.7	70	24.22	1	2014-07-26	2014-07-31	1		90100	2	0.4	0	4	3	4	1	0	0	1	1	1	1	0	2	2	2	1	20		0	0	0	0	0	11.8	10180	4.64	0.92	110	127.1	61.2	109	51
13	2014-08-06	1	1949-10-24	64	511130	14040329	1.79	102	31.83	0	2014-08-04	2014-08-07	0		38600	1	0.6	0	1	0	3	1	0	0	1	1	1	0	0	0	1	1	1	40	2	0	0	0	0	0	10.7	10220	5	1.1	86	117.4	98.2	183	35
14	2014-08-26	1	1951-12-06	62	887103	14223914	1.71	110	37.62	0	2014-08-24	2014-08-27	1		15200	1	0.46	0	0	4	0	1	1	1	1	1	0	1	1	1	3	3	1	10		0	0	0	0	0	10.3	8370	4.68	0.81	184	111.7	46.6	89	31
15	2014-08-29	1	1942-12-20	71	472728	1424937	1.71	82	28.04	1	2014-08-27	2014-08-29	0		607	1	0.71	0	1	3	4	1	1	1	1	1	1	1	1	0	2	2	1	20	3	0	1	0	0	0	12.3	6050	5.08	0.9	214	131.9	92.8	183	32
16	2014-09-10	1	1948-10-03	65	1154788	14361218	1.68	73	25.86	1	2014-09-08	2014-09-11	1		22100	1	0.54	0	4	0	0	1	0	0	1	1	0	0	0	0	1	1	1	10	2	0	0	0	0	0	9.7	10690	4.72	0.6	99	105.3	54.8	112	30
17	2014-10-01	0	1950-04-27	64	379099	14552409	1.58	70	28.04	0	2014-09-30	2014-10-02	1		10700	1	0.64	0	3	4	3	1	0	0	1	1	1	0	0	0	2	2	1	20	2	0	0	0	0	0	11.2	5470	4.56	0.8	91	130.6	68.3	147	43
18	2014-10-03	1	1973-04-25	41	505091	14571731	1.7	70	24.22	0	2014-10-01	2014-10-04	1		76100	1	0.42	0	4	0	3	0	0	0	1	1	1	0	0	0	1	1	1	80	3	0	0	0	0	0	11.1	7000	4.72	0.78	92	106.3	67.7	133	36
21	2014-11-07	1	1948-02-26	66	1485780	14904248	1.75	85	27.76	0	2014-11-06	2014-11-08	1		179000	1	0.45	0	4	2	4	0	1	0	1	1	1	1	0	0	2	2	1	10	2	0	0	0	0	0	10.6	10840	4.84	0.92	96	152.9	99.4	239	75
22	2014-11-26	1	1948-01-29	66	799078	15052972	1.7	90	31.14	0	2014-11-24	2014-11-27	1		11100	2	0.45	0	4	0	0	1	0	0	1	1	0	0	0	2	2	2	1	10		0	0	0	0	0	10.9	9160	4.6	0.9	88	119.8	81.1	150	40
24	2015-01-09	1	1963-09-23	51	1327649	15368992	1.8	120	37.04	1	2015-01-09	2015-01-10	1		39700	1	0.47	0	0	3	4	0	0	0	1	1	0	0	0	0	2	2	1	40	3	0	0	0	0	0	11.2	6780	4.72	0.9	93	100.6	90.8	168	32
25	2015-01-29	1	1951-01-29	63	1555027	15535053	1.67	74	26.53	1	2015-01-27	2015-01-29	0		1320	1	0.65	0	3	3	4	1	1	1	1	1	1	1	1	2	2	2	1	10	1825	0	0	0	0	0	11.3	7680	4.84	0.9	226	105.3	66.4	129	30
26	2015-02-03	1	1952-03-06	62	1575859	15597129	1.7	95	32.87	0	2015-02-02	2015-02-04	1		9380	1	0.5	0	4	1	0	1	0	0	1	1	1	0	0	0	2	2	1	10	2	0	0	0	0	0	10	9870	4.48	0.86	114	111.5	87.5	158	35
27	2015-02-03	1	1945-10-20	69	795741	15576691	1.73	108	36.09	0	2015-01-30	2015-02-04	1		23300	1	0.45	0	4	2	4	1	1	0	1	1	1	0	1	0	1	1	1	20	4	0	0	0	0	0	9.9	8620	4.64	1.04	117	104.3	122	193	32
28	2015-02-10	1	1959-08-17	55	486577	15643263	1.76	92.5	29.86	1	2015-02-07	2015-02-11	1		23200	1	0.4	0	4	0	0	1	0	0	1	1	1	0	0	2	2	2	1	10	1825	0	0	0	1	0	11.1	9720	4.56	1.62	88	95.2	66	126	22
29	2015-02-18	1	1962-10-03	52	1106870	15718019	1.75	85	27.76	0	2015-02-15	2015-02-19	1		14600	1	0.44	0	3	0	0	0	0	0	1	1	1	0	0	0	3	3	1	40	2	1	0	0	0	0	9.3	6620	4.96	1.08	95	104.1	77.5	149	36
30	2015-03-31	1	1965-05-07	49	1798340	16087885	1.76	83	26.79	0	2015-03-29	2015-03-31	1		136000	1	0.64	0	0	4	0	0	0	0	1	1	0	0	0	6	1	1	1	40		1	0	0	1	0	10.1	8400	4.44	1.1	101	106.9	135.7	229	28
31	2015-04-14	0	1955-10-13	59	524230	16201263	1.55	57	23.73	1	2015-04-11	2015-04-14	1		13900	1	0.65	0	2	4	0	0	0	0	1	1	0	0	1	0	1	1	1	20	4	1	0	0	0	0	10.8	15930	4.8	0.69	215	145.8	84.4	177	58
33	2015-05-14	0	1961-10-18	53	1810100	16469525	1.65	75	27.55	1	2015-05-11	2015-05-15	1		42600	1	0.44	0	3	3	4	1	0	0	1	1	1	0	0	0	2	2	1	40	4	0	0	0	0	0	11	9990	4.68	1	86	131.8	128	224	45
34	2015-05-29	0	1959-01-20	56	360406	16598620	1.61	66	25.46	1	2015-05-25	2015-05-29	1		39500	1	0.58	0	0	4	0	1	1	0	1	1	1	1	0	0	1	1	1	10	5	0	0	0	1	0	11.5	6200	4.56	0.8	89	181.2	60.1	142	82
35	2015-06-24	1	1966-06-09	49	808607	16850427	1.81	79	24.11	0	2015-06-22	2015-06-24	1		18400	1	0.59	0	4	4	0	0	0	0	1	1	0	0	0	0	2	2	1	20	3	0	0	0	0	0	10	7410	4.8	1.11	88	104.7	99	196	28
36	2015-07-01	0	1964-05-21	51	381955	16895455				0	2015-06-26	2015-07-01	1		1290	1	0.56	0	3	4	0	0	1	0	1	1	1	0	1	0	1	1	1	40	5	0	0	0	0	0	11.5	6000	4.92	0.6	245	160.6	67.2	142	53
37	2015-07-03	1	1943-04-24	72	1435837	16939563	1.74	91	30.06	0	2015-07-01	2015-07-04	0		724	1	0.57	0	4	4	0	0	0	0	1	1	0	0	0	0	2	2	1	10	3	0	0	0	0	0	11.4	6760	4.84	1.3	124	118.9	93.1	175	33
38	2015-07-23	1	1962-02-10	53	1774836	17110440	1.8	113	34.88	0	2015-07-22	2015-07-24	0		3980	1	0.5	0	4	4	4	1	0	0	1	1	1	0	0	0	1	1	1	40	2	0	0	0	0	0	10	8990	4.48	0.7	83	94.7	73.6	127	31
39	2015-08-05	1	2015-10-28	49	1832539	17204166	1.68	85	30.12	0	2015-08-03	2015-08-06	0		16300	1	0.59	0	4	0	0	0	0	0	1	1	0	0	0	0	2	2	1	40	3	0	0	0	0	0	10.7	6350	4.48	1.15	97	94.1	67	120	26
40	2015-08-12	1	1962-05-03	53	453176	17263625	1.75	100	32.65	1	2015-08-10	2015-08-13	1		15100	1	0.65	0	2	4	4	1	0	0	1	1	1	0	0	2	2	2	1	40		0	0	0	1	0	10.8	7270	4.68	1.1	104	122.5	90.4	157	43
42	2015-08-12	1	1947-02-10	68	508743	17264674	1.74	88	29.07	0	2015-08-09	2015-08-13	0		2640	1	0.68	0	3	3	4	1	1	0	1	1	1	1	0	0	2	3	1	10	5	0	0	0	0	0	10.7	10200	4.6	0.9	212	112.5	107.2	165	31
43	2015-08-12	1	1962-07-12	53	1834742	17284608	1.75	100	32.65	0	2015-08-11	2015-08-12	0		3920	1	0.65	0	4	0	4	1	0	0	1	1	1	0	0	0	1	2	1	10	2	0	0	0	0	0	10.3	6060	1.21	1.1	89	134	117.7	205	35
44	2015-10-13	0	1944-05-13	71	615791	17823316	1.54	71	29.94	0	2015-10-09	2015-10-14	0		1180	1	0.47	0	4	0	0	0	0	0	1	1	1	0	0	0	1	1	1	40	5	0	0	0	0	0	10	9810	4.68	0.7	93	101	84	139	32
45	2015-11-04	0	1960-09-18	55	1322689	18020806	1.63	55	20.7	0	2015-11-01	2015-11-05	1		30600	1	0.49	0	4	0	0	0	0	0	1	1	0	0	0	0	1	1	1	40	4	0	0	0	0	0	10.7	6490	4.88	0.71	96	122	92	159	41
46	2015-10-17	1	1947-12-04	67	1676245	18158662	1.7	80	27.68	1	2015-11-16	2015-11-18	0		1010	1	0.6	0	3	2	3	1	0	0	1	1	1	0	0	2	2	2	1	10	1095	0	0	0	0	0	9.6	9090	5.16	0.86	105	135	81	170	41
[truncated: 45 more columns]

## Sheet: Planilha1
Ambulatoriais			IAM
Variável	Definição		Variável	Definição
Sexo	0- feminino; 1- masculino		Sexo	0- feminino; 1- masculino
Grupo	0- escore zero; 1- escore >100		Altura	número em cm
Tempo jejum	horas		Peso	número em kg
Altura	número em cm		IMC	número
Peso	número em kg		Tabagismo	0- não; 1- sim
IMC	número		Tipo IAM	0-s/supra; 1-c/supra
Tabagismo	0- não; 1- sim		Tronco	0- sem lesão; 1 - lesão < 50%; 2- lesão > 50-69%; 3- 70%; 4- angioplastia
Ex-tabagismo	0- não; 1- sim		DA	0- sem lesão; 1 - lesão < 50%; 2- lesão > 50-69%; 3- 70%; 4- angioplastia
Nº cigarros	número		CD	0- sem lesão; 1 - lesão < 50%; 2- lesão > 50-69%; 3- 70%; 4- angioplastia
Nº anos	número		CX/ marginal	0- sem lesão; 1 - lesão < 50%; 2- lesão > 50-69%; 3- 70%; 4- angioplastia
Anos/maço	número		HAS	0- não; 1- sim
IECA/BRA	0- não; 1- sim		DM	0- não; 1- sim
AAS	0- não; 1- sim		IAM prévio	0- não; 1- sim
Metformina	0- não; 1- sim		AAS	0- não; 1- sim
Outros hipolip	0- não; 1- sim		Inibidor de ADP	0- não; 1- sim
Estatina	0- não; 1-atorva; 2- rosuva; 3-sinva;4- prava;5- Pitavastatina		IECA/BRA	0- não; 1- sim
Dose estatina	número		Metformina	0- não; 1- sim
Ezetimiba	0- não; 1- sim		Outros hipolip	0- não; 1- sim
Inibidor de ADP	0- não; 1- sim		Estatina	0- não; 1-atorva; 2- rosuva; 3-sinva;4- prava;5-Pitavastatina
Reposição Ca	0- não; 1- sim		Dose estatina	número
Vit D	0- não; 1- sim		Ezetimiba	0- não; 1- sim
Alendronato	0- não; 1- sim		Reposição Ca	0- não; 1- sim
Dor precordial	0 -não; 1 - típica; 2- atípica		Vit D	0- não; 1- sim
HAS	0- não; 1- sim		Alendronato	0- não; 1- sim
DM	0- não; 1- sim		Evento 30 dias	0- sem evento; 1 - reinfarto/trombose stent; 2 - AVC; 3 - morte
IAM	0- não; 1- sim
FEVE < 1 ano	número
Escore Ca	número
Tronco	0- sem lesão; 1 - lesão < 50%; 2- lesão > 50 69%; 3- 70%; 5- não avaliado
DA	0- sem lesão; 1 - lesão < 50%; 2- lesão > 50 69%; 3- 70%
CD	0- sem lesão; 1 - lesão < 50%; 2- lesão > 50 69%; 3- 70%
CX	0- sem lesão; 1 - lesão < 50%; 2- lesão > 50 69%; 3- 70%
*	angiotomografia com avaliação limitada
			FEVE < 1 ano	número
			Escore Ca	número
